# Supplementary material for: Earth observation informed modelling of flash floods
Source: Copernicus journal article supplement (doi:10.5194/egusphere-2024-2722), 2024-10-08
Supplement: Supplementary file 1 [file egusphere-2024-2722-supplement.pdf]

# Supplement: Earth observation informed modelling of flash floods

C. Scott Watson<sup>1</sup>, Maggie Creed<sup>2</sup>, Januka Gyawali<sup>3</sup>, Sameer Shadeed<sup>4</sup>, Jamal Dabbeek<sup>5</sup>, Divya L. Subedi<sup>6</sup>, Rojina Haiju<sup>6</sup>

<sup>1</sup> COMET, School of Earth and Environment, University of Leeds, LS2 9JT, UK

<sup>2</sup> James Watt School of Engineering, The University of Glasgow, Glasgow, G12 8QQ, UK

<sup>3</sup> Practical Action, Kathmandu, Nepal

<sup>4</sup> Water and Environmental Studies Institute, An-Najah National University, Nablus, Palestine

<sup>5</sup> Faculty of Engineering and Information Technology, An-Najah National University, Nablus, Palestine

<sup>6</sup> Water and Climate Program, Nepal Development Research Institute (NDRI), Lalitpur, Nepal

Correspondence to: C. Scott Watson ([c.s.watson@leeds.ac.uk](mailto:c.s.watson@leeds.ac.uk))

**Supplementary Table 1: Flood model accuracy assessment and Manning's n value test.**

| Extent         | Model       | Mannings | F1 score | Precision | Recall | IoU   |
|----------------|-------------|----------|----------|-----------|--------|-------|
| Study area     | FastFlood   | 0.01     | 0.699    | 0.756     | 0.651  | 0.538 |
|                |             | 0.02     | 0.718    | 0.704     | 0.733  | 0.560 |
|                |             | 0.03     | 0.714    | 0.663     | 0.773  | 0.555 |
|                |             | 0.04     | 0.708    | 0.640     | 0.792  | 0.548 |
|                |             | 0.05     | 0.702    | 0.619     | 0.810  | 0.540 |
|                | HAIL-CAESAR | 0.01     | 0.729    | 0.756     | 0.704  | 0.574 |
|                |             | 0.02     | 0.730    | 0.753     | 0.708  | 0.575 |
|                |             | 0.03     | 0.730    | 0.746     | 0.714  | 0.575 |
|                |             | 0.04     | 0.728    | 0.734     | 0.723  | 0.572 |
|                |             | 0.05     | 0.727    | 0.719     | 0.736  | 0.571 |
| HEC-RAS domain | FastFlood   | 0.01     | 0.714    | 0.817     | 0.634  | 0.556 |
|                |             | 0.02     | 0.740    | 0.761     | 0.719  | 0.587 |
|                |             | 0.03     | 0.744    | 0.725     | 0.763  | 0.592 |
|                |             | 0.04     | 0.744    | 0.701     | 0.792  | 0.592 |
|                |             | 0.05     | 0.738    | 0.679     | 0.809  | 0.585 |
|                | HAIL-CAESAR | 0.01     | 0.752    | 0.753     | 0.751  | 0.602 |
|                |             | 0.02     | 0.752    | 0.754     | 0.750  | 0.603 |
|                |             | 0.03     | 0.751    | 0.754     | 0.748  | 0.601 |
|                |             | 0.04     | 0.751    | 0.752     | 0.750  | 0.601 |
|                |             | 0.05     | 0.751    | 0.745     | 0.757  | 0.601 |
|                | HEC-RAS     | 0.01     | 0.678    | 0.523     | 0.965  | 0.513 |
|                |             | 0.02     | 0.742    | 0.646     | 0.873  | 0.590 |
|                |             | 0.03     | 0.735    | 0.669     | 0.816  | 0.581 |
|                |             | 0.04     | 0.741    | 0.641     | 0.878  | 0.588 |
|                |             | 0.05     | 0.741    | 0.635     | 0.890  | 0.589 |

|      |       |       |       |       |
|------|-------|-------|-------|-------|
| 0.06 | 0.761 | 0.683 | 0.857 | 0.614 |
| 0.07 | 0.760 | 0.682 | 0.859 | 0.613 |

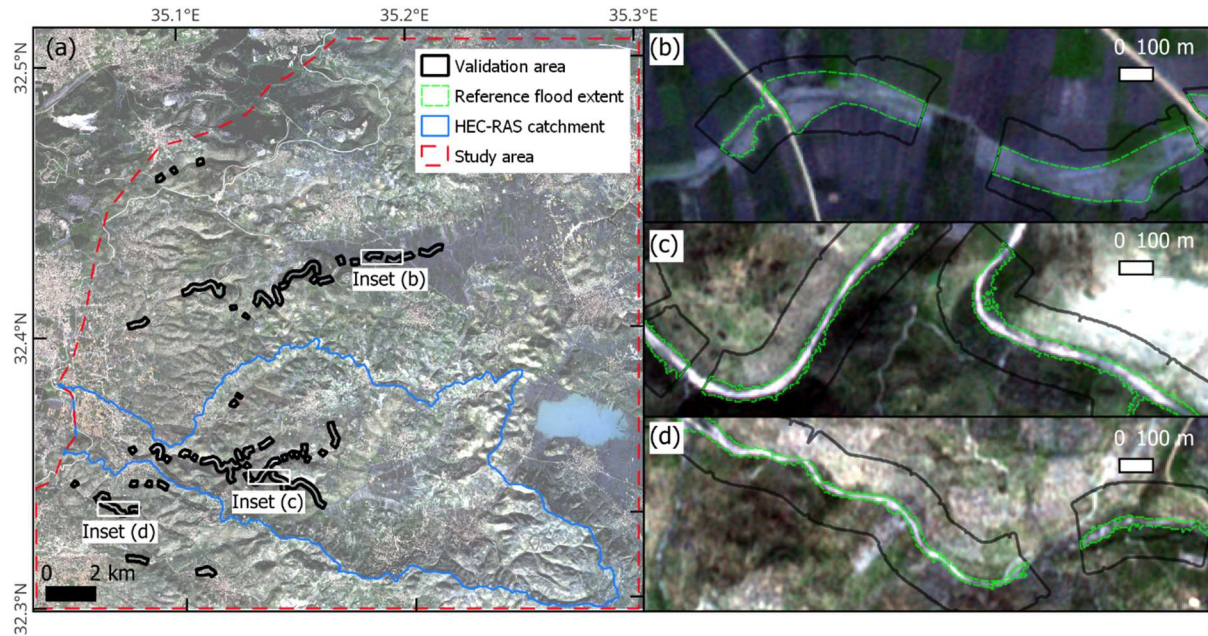

**Figure S1: Validation areas containing the NDVI-derived reference flood extent. Basemap is a RapidEye-1 image (15<sup>th</sup> January 2013). Image © 2013 Planet Labs PBC.**

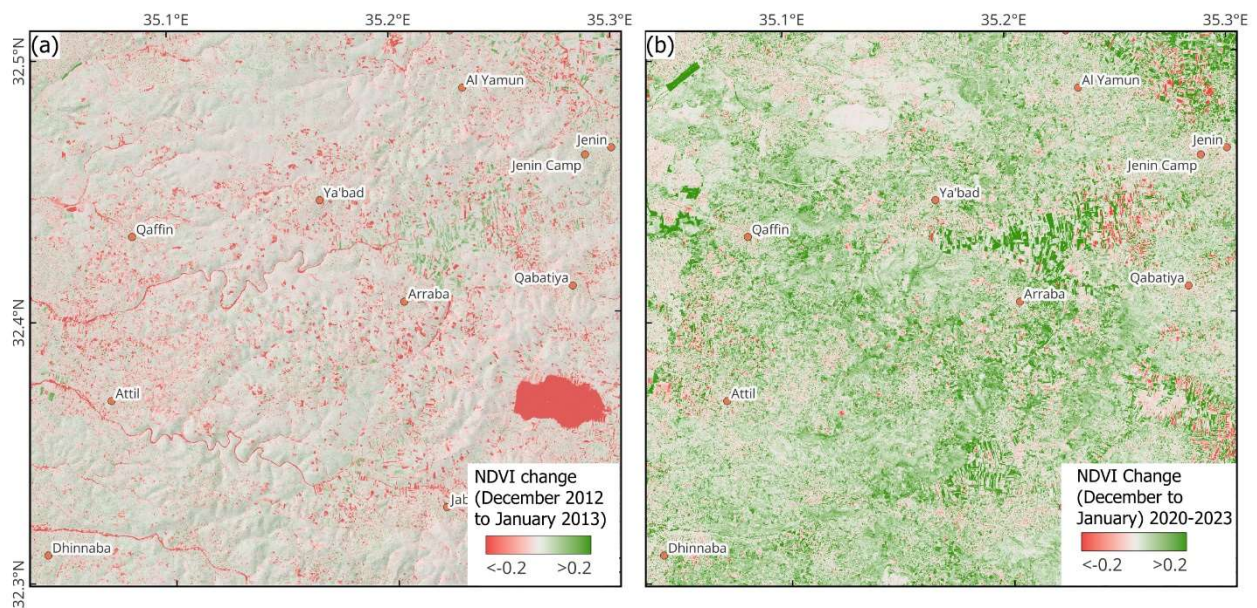

**Figure S2: (a) NDVI change derived from RapidEye imagery December 2012 to January 2013. Greens represent an NDVI increase. (b) NDVI change December to January derived from monthly median composites of Sentinel-2 imagery (2020–2023)**

### Example HAIL-CAESAR parameter file:

```
# FILE INFORMATION
#=====
dem_read_extension: asc
dem_write_extension: asc
read_path: /nobackup/24_Nablus/future/historical_1in100/
write_path: /nobackup/24_Nablus/future/historical_1in100/output/
read_fname: input_DEM
write_fname: hist1in100.dat
timeseries_save_interval: 60
# SUPPLEMENTARY FILES
#=====
hydroindex_file: hydro.asc
rainfall_data_file: rainfall.txt
# NUMERICAL
#=====
min_time_step: 0 # IN SECONDS
max_time_step: 3600 # IN SECONDS
run_time_start: 0 # ZERO UNLESS RESTARTING RUN
max_run_duration: 400 # IN MODEL HOURS, MUST BE T-1, I.E. '71' FOR 72HR SIMULATION - SORRY!
# HYDROLOGY
#=====
hydro_model_only: yes # SWITCHES OFF THE EROSION
water_init_from_raster_on: no # WILL INITIALISE THE INITIAL WATER DEPTHS FROM A DEM FILE, SPECIFIED ABOVE
topmodel_m_value: 0.003 # SEE LITERATURE FOR GUIDANCE
in_out_difference: 0 # CUMECS, UNTESTED
min_q_for_depth_calc: 0.1 # CUMECS
max_q_for_depth_calc: 1000.0 # CUMECS
water_depth_erosion_threshold: 0.01 # METRES
slope_on_edge_cell: 0.005 # SHOULD BE APPROX EQUAL TO CHAN SLOPE NEAR OUTLET
evaporation_rate: 0.0 # NOT YET IMPLEMENTED
courant_number: 0.4 # NO LOWER THAN 3 PLEASE, MAX AROUND 0.7 - NUMERICAL STABILITY CONTROL
froude_num_limit: 0.7 # CONTROLS FLOW BETWEEN CELLS PER TIME STEP (SEE DOCS)
mannings_n: 0.03 # SEE LITERATURE FOR GUIDANCE
spatially_variable_mannings_on: no
hflow_threshold: 0.00001 # IN METRES, DETERMINES IF HORIZ. FLOW CALCULATED
# PRECIPITATION
#=====
rainfall_data_on: yes # IF YES, HAVE YOU SET A RAINFALL FILE?
# VALUES IN MM/HR, REGARDLESS OF TIMESTEP
rain_data_time_step: 1440 # MINUTES, MUST MATCH RAINFALL FILE
spatial_var_rain: yes # IF YES, HAVE YOU SET A HYDROINDEX FILE?
num_unique_rain_cells: 3 # SHOULD MATCH NO. OF HYDROINDEX ZONES, COUNT THEM
spatially_complex_rainfall_on: no # UNTESTED...
interpolation_method: cubic # CAREFUL NOW.
generate_artificial_rainfall: no # PIPE DREAM.
# WRITE OUTPUT RASTERS
#=====
raster_output_interval: 60 # IN MODEL MINUTES
write_waterdepth_file: yes
waterdepth_outfile_name: hist1in100_WaterDepths_
```
